# Supplementary material for: Drought conditions disrupt atmospheric carbon uptake in a Mediterranean saline lake
Source: Copernicus journal article supplement (doi:10.5194/bg-21-5117-2024), 2024-11-18
Supplement: Supplementary file 1 [file bg-21-5117-2024-supplement.pdf]

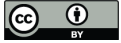

*Supplement of*

## **Drought conditions disrupt atmospheric carbon uptake in a Mediterranean saline lake**

**Ihab Alfadhel et al.**

*Correspondence to:* Ignacio Peralta-Maraver ([peraltamaraver@ugr.es](mailto:peraltamaraver@ugr.es)) and Penélope Serrano-Ortiz ([penelope@go.ugr.es](mailto:penelope@go.ugr.es))

The copyright of individual parts of the supplement might differ from the article licence.

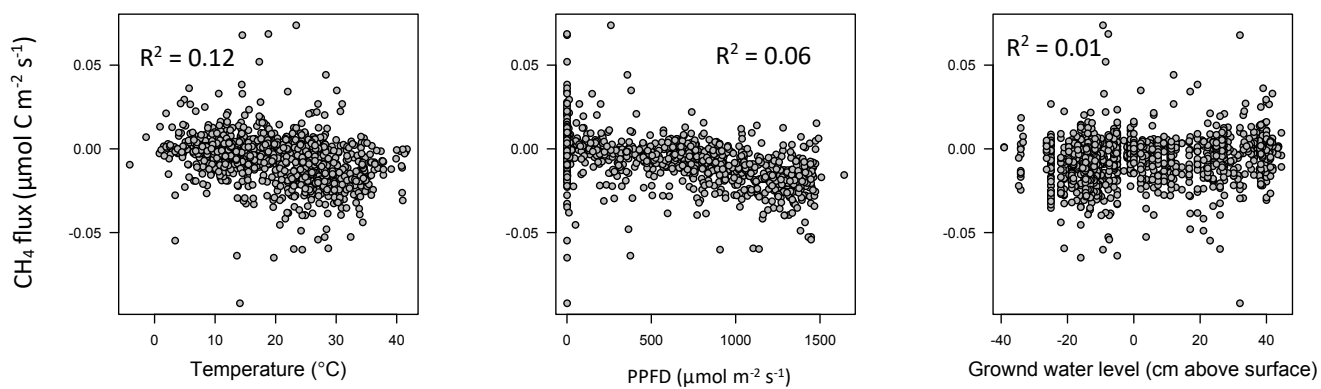

**Figure S1.** Relationship between methane (CH<sub>4</sub>) flux and temperature, incident solar radiation measured as incoming photosynthetic photon flux density (PPFD), and groundwater level.

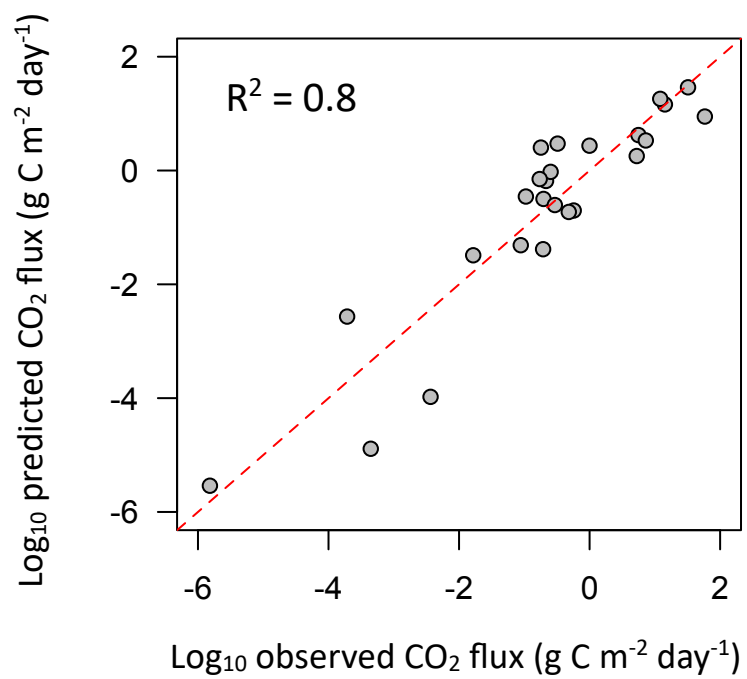

**Figure S2.** Observed vs predicted values of CO<sub>2</sub> flux obtained from our retrospective prediction model considering the study period.

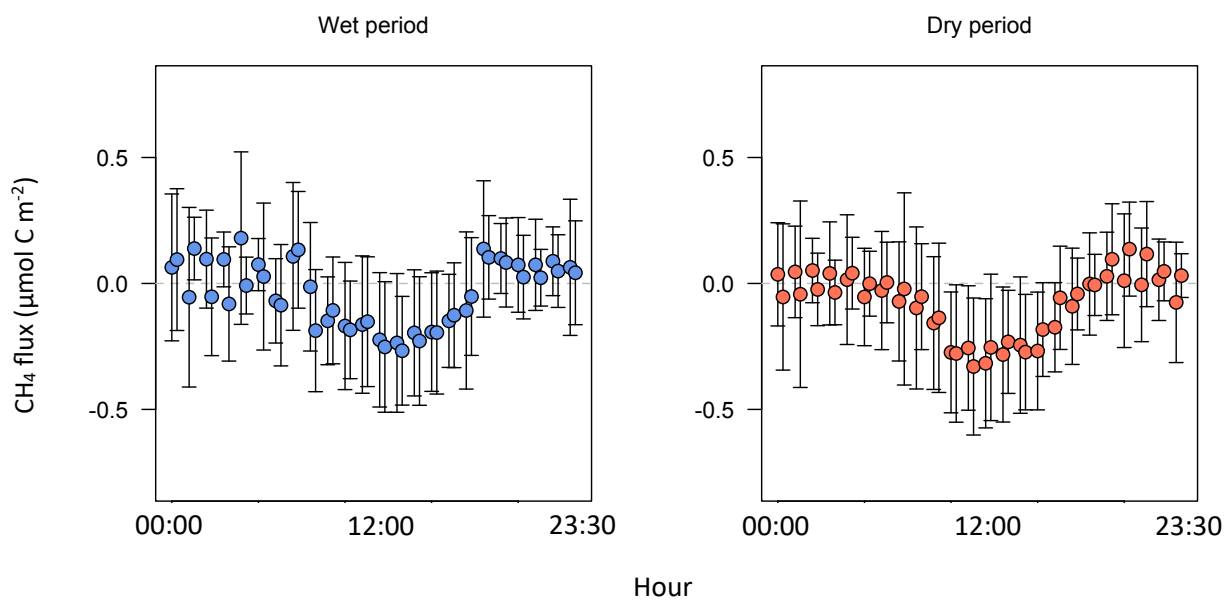

**Figure S3.** Integrated values distribution of CH<sub>4</sub> flux on a daily scale during the wet and dry periods.

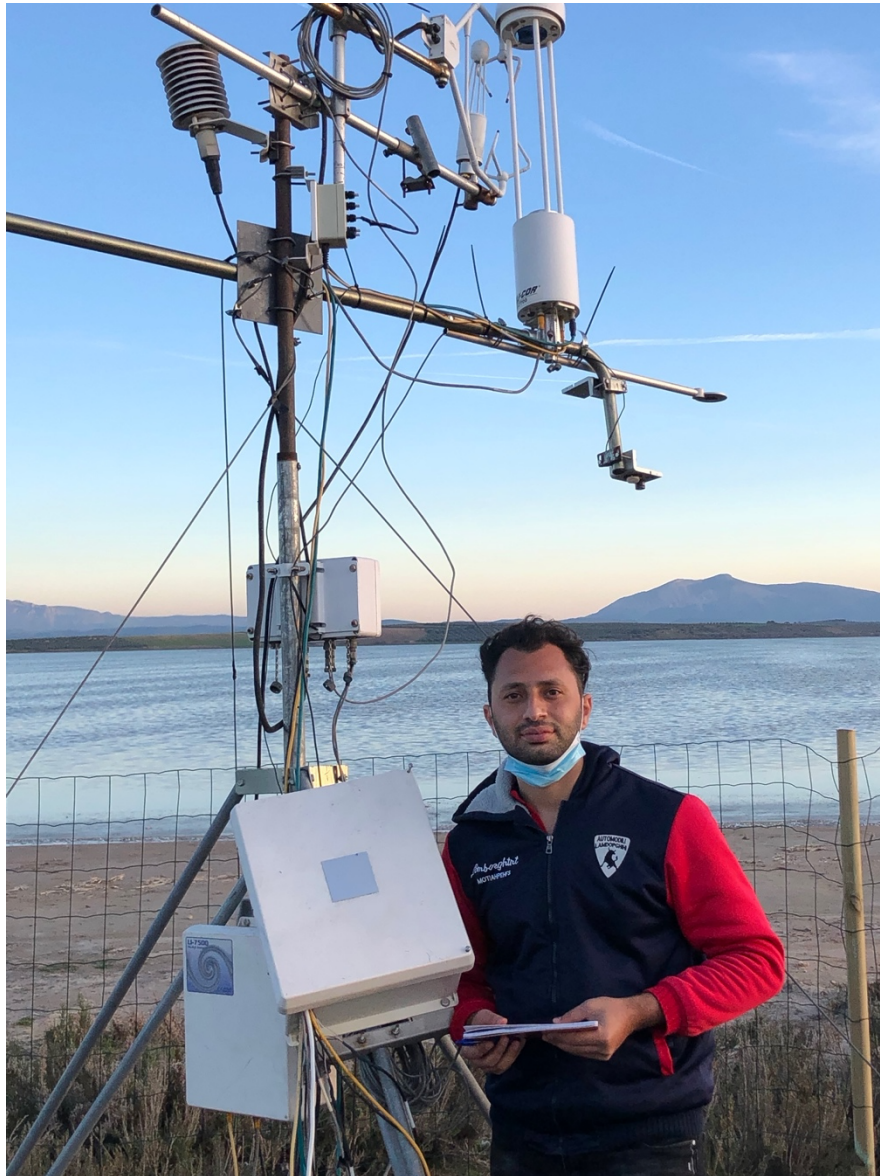

**Image S1.** Photograph of the Eddy Covariance tower installed at Fuente de Piedra along with the first author of the study (Ihab Alfadhel). Source: photograph taken by the authors.
